# Supplementary material
Source: publisher figshare collection journal article supplement (https://karger.figshare.com/ndownloader/files/27950748)
Supplement: Supplementary file 1 [file 27950748]

## Sheet: Sheet1
Table S2: The complete descriptions of custom gene sets of CRISPR screening library and RNA-seq data
Classifications	Descriptions
CRISPR Screening Library Mechanisms: H2O2-induced Oxidative stress	Cell line:K562 cells Species: Human Size: 174 Effect: Sensitizers(53)/Protectors(121) Library: CRISPR/Cas9 knockout library(self-design) Cut.off: FDR≤0.05 Treatments: Four times with LC50 doses of H2O2(30 mM for K562)for 5, 15, 30, and 60 minutes.
CRISPR Screening Library Mechanisms: Tunicamycin-induced ER-stress	Cell line: Human foreskin fibroblast Species: Human Size: 422 Effect: Sensitizers(133)/Protectors(289) Library: AVANA library Cut.off: Pvalue 0.01 Treatments: 200ng/ml Tunicamycin for 3 weeks
CRISPR Screening Library Mechanisms: CHOP-related ER-stress	Cell line: HEK 293T Species: Human Size: 271 Effect: Protectors Library: Human GeCKOv2 library Cut.off: P ≤ 0.001 Treatments: To perform fluorescence-activated cell sorting (FACS) to isolate the bright cell populations that express a high amount of mCherry, as CRISPR knockout of genes that normally suppress CHOP up-regulation would lead to an increase in mCherry expression.
CRISPR Screening Library Mechanisms: NRF2-related cellular homeostasis	Cell line: HK2 cells Species: Human Size: 235 Effect: Protectors Library: The human activity-optimized CRISPR knockout library Treatments: Screening cells for the resistance of blasticidin, as the BSD-PEST transcription is under the control of the NRF2 transcription factor(BSD, a blasticidin resistance gene; If CRISPR knocks out genes lead NRF2 up-regulation, cells will convey resistance of blast…
CRISPR Screening Library Mechanisms: Caspase11-dependent pyroptosis	Cell line: RAW 264.7 cells Species: Mouse Size: 100 Effect: Sensitizers Library: CRISPR-Cas9 genome-wide knockout library Cut.off: logFC >2 Treatments: CTB and LPS (at 4 µg per 5 × 104 cells of each)for 16h
CRISPR Screening Library Mechanisms: NLRP1B-mediated pyroptosis	Cell line: RAW 264.7 cells Species: Mouse Size: 268 Effect: Sensitizers Library: The mouse GeCKO 2-vector system sgRNA pool B library Cut.off: Pvalue <0.05 Treatments: VbP (2 µM) 1weeks and LT (1 µg/mL) 3h treatments (n = 3 per treatment)
RNA-seq Mechanisms: Pyroptosis	Cell line: Adipose-tissue-derived mesenchymal stem cells (ASCs) Species: Mouse Size: 114 Treatments: ASCs treated with SLNB(supernatant collected from LPS/NIG-treated BMDMs)
RNA-seq Mechanisms: ER-stress	Cell line: Mouse embryo fibroblasts (MEFs) Species: Mouse Size: 770 Cut.off: logFC >2,FDR<0.05 Treatments: Tunicamycin (2 μg/ml) for 10h
RNA-seq Mechanisms: Oxidative stress	Cell line: Primary human epidermal melanocytes (HEM) Species: Human Size: 22 Cut.off: logFC >2,FDR<0.05 Treatments: 250 μM H2O2 for 48h
Additional Texts	1.Size: the number of genes that we used to perform the intersection and GSEA.Size may differ from the results of original researches, as 1)when biomaRt transformed mouse ensemblID from human ensemblID or gene symbol, a small number of genes could be mismatched and lost, so we manually deleted this part of genes,2)We could only access part of the data of some researches. 2.We could only access up…
